# Supplementary material
Source: PubMed Central journal article supplement (PMC2576290)
Supplement: NIHMS73484-supplement-erratum.pdf [file NIHMS73484-supplement-erratum.pdf]

Erratum

**Erratum to “A novel tensor distribution model  
for the diffusion-weighted MR signal”  
[NeuroImage 37 (2007) 164–176]**

Bing Jian,<sup>a</sup> Baba C. Vemuri,<sup>a,\*</sup> Evren Özarslan,<sup>b</sup>  
Paul R. Carney,<sup>c</sup> and Thomas H. Mareci<sup>d</sup>

<sup>a</sup>Department of Computer and Information Science and Engineering, University of Florida, P.O. Box 116120, Gainesville, FL 32611, USA

<sup>b</sup>Section on Tissue Biophysics and Biomimetics, LIMB, NICHD, National Institutes of Health, Bethesda, MD 20892, USA

<sup>c</sup>Department of Pediatrics, University of Florida, Gainesville, FL 32610, USA

<sup>d</sup>Department of Biochemistry and Molecular Biology, University of Florida, P.O. Box 100245, Gainesville, FL 32610, USA

Available online 1 April 2008

---

Because of errors introduced by the typesetter, the following corrections should be made:

- Equation (4) currently displayed as

$$S(\mathbf{q}) = S_0 \int_{\mathcal{P}_n} \exp[-b\mathbf{g}^T \mathbf{D}\mathbf{g}]$$

$$dF = S_0 \int_{\mathcal{P}_n} f(\mathbf{D}) \exp[-b\mathbf{g}^T \mathbf{D}\mathbf{g}] d\mathbf{D}$$

is incorrect. The correct form is

$$\begin{aligned} S(\mathbf{q}) &= S_0 \int_{\mathcal{P}_n} \exp[-b\mathbf{g}^T \mathbf{D}\mathbf{g}] dF \\ &= S_0 \int_{\mathcal{P}_n} f(\mathbf{D}) \exp[-b\mathbf{g}^T \mathbf{D}\mathbf{g}] d\mathbf{D}. \end{aligned}$$

---

DOI of original article: [10.1016/j.neuroimage.2007.03.074](https://doi.org/10.1016/j.neuroimage.2007.03.074)

\* Corresponding author.

E-mail address: [vemuri@cise.ufl.edu](mailto:vemuri@cise.ufl.edu) (B.C. Vemuri).

Available online on ScienceDirect ([www.sciencedirect.com](http://www.sciencedirect.com)).

- Equation (5) currently displayed as

$$S(\mathbf{q}) = S_0 \int_{\mathcal{P}_n} \exp(-b\mathbf{g}^T \mathbf{D}\mathbf{g})$$

$$dF = S_0 \int_{\mathcal{P}_n} \exp(-\text{trace}(\mathbf{B}\mathbf{D}))$$

is incorrect. The correct form is

$$S(\mathbf{q}) = S_0 \int_{\mathcal{P}_n} \exp(-b\mathbf{g}^T \mathbf{D}\mathbf{g}) dF$$

$$= S_0 \int_{\mathcal{P}_n} \exp(-\text{trace}(\mathbf{B}\mathbf{D})) dF.$$

- In Eq. (8),  $(\Theta + \Sigma^{-1}) \in \mathcal{P}_n$  is incorrect and should read  $(\Theta + \Sigma^{-1}) \in \mathcal{P}_n$ .
- Equation (10) currently displayed as,

$$S(\mathbf{q})/S_0(1 + (b\mathbf{g}^T \hat{\mathbf{D}}\mathbf{g})/p)^{-p}$$

is incorrect. The correct form is

$$S(\mathbf{q}) = S_0(1 + (b\mathbf{g}^T \hat{\mathbf{D}}\mathbf{g})/p)^{-p}.$$

- On page 168, in the last line of text before Eq. (16),  $F(\mathbf{D})$  should be changed to  $dF$ .
- In Fig. 2, the range of the  $x$  axis, “std. dev. of noise,” should be from 0 to 0.1 as stated in the text, not from 0 to 1 as currently displayed in Fig. 2.
- Eq. (18) currently displayed as

$$(2\pi i)^{-n(n+1)/2} \int_{\text{Re}\mathbf{Z}=\mathbf{X}_0} \mathcal{L}f(\mathbf{Z}) \exp[\text{trace}(\mathbf{Y}\mathbf{Z})]$$

$$d\mathbf{Z} = \begin{cases} f(\mathbf{Y}), & \text{for } \mathbf{Y} \in \mathcal{P}_n \\ 0, & \text{otherwise} \end{cases}$$

is incorrect. The correct form is

$$(2\pi i)^{-n(n+1)/2} \int_{\text{Re}\mathbf{Z}=\mathbf{X}_0} \mathcal{L}f(\mathbf{Z}) \exp[\text{trace}(\mathbf{Y}\mathbf{Z})] d\mathbf{Z}$$

$$= \begin{cases} f(\mathbf{Y}), & \text{for } \mathbf{Y} \in \mathcal{P}_n \\ 0, & \text{otherwise.} \end{cases}$$
